# Supplementary material for: Outbreak of Middle East Respiratory Syndrome Coronavirus in Camels and Probable Spillover Infection to Humans in Kenya
Source: MDPI journal article supplement (doi:10.3390/v14081743), 2022-08-09
Supplement: s1 [file s1]

## Supplementary Tables

**Supplementary Table S1:** Distribution of PCR Positivity by enrolled herd among 33 camel herds in Marsabit

| Herd Number               | Estimated herd size (a) | Enrolled calves (b)(%) | No. of PCR Positive Calves (c) | Percent positive (c/b)% |
|---------------------------|-------------------------|------------------------|--------------------------------|-------------------------|
| M01                       | 19                      | 17                     | 1                              | 5.9%                    |
| M02                       | 20                      | 18                     | 8                              | 44.4%                   |
| M03                       | 15                      | 8                      | 5                              | 62.5%                   |
| M04                       | 31                      | 21                     | 9                              | 42.9%                   |
| M05                       | 40                      | 31                     | 18                             | 58.1%                   |
| M06                       | 46                      | 15                     | 0                              | 0.0%                    |
| M07                       | 32                      | 6                      | 3                              | 50.0%                   |
| M08                       | 14                      | 3                      | 0                              | 0.0%                    |
| M09                       | 32                      | 3                      | 0                              | 0.0%                    |
| M10                       | 89                      | 6                      | 0                              | 0.0%                    |
| M11                       | 39                      | 2                      | 0                              | 0.0%                    |
| M12                       | 101                     | 3                      | 0                              | 0.0%                    |
| M13                       | 40                      | 7                      | 0                              | 0.0%                    |
| M14                       | 21                      | 6                      | 5                              | 83.3%                   |
| M15                       | 21                      | 2                      | 0                              | 0.0%                    |
| M16                       | 20                      | 1                      | 0                              | 0.0%                    |
| M17                       | 10                      | 1                      | 0                              | 0.0%                    |
| M18                       | 60                      | 1                      | 0                              | 0.0%                    |
| M19                       | 22                      | 10                     | 6                              | 60.0%                   |
| M20                       | 24                      | 4                      | 2                              | 50.0%                   |
| M21                       | 37                      | 5                      | 2                              | 40.0%                   |
| M22                       | 75                      | 1                      | 0                              | 0.0%                    |
| M23                       | 50                      | 16                     | 12                             | 75.0%                   |
| M24                       | 39                      | 5                      | 0                              | 0.0%                    |
| M25                       | 40                      | 9                      | 4                              | 44.4%                   |
| M26                       | 14                      | 2                      | 0                              | 0.0%                    |
| M27                       | 25                      | 5                      | 3                              | 60.0%                   |
| M28                       | 22                      | 2                      | 2                              | 100.0%                  |
| M29                       | 44                      | 3                      | 0                              | 0.0%                    |
| M30                       | 97                      | 1                      | 0                              | 0.0%                    |
| M31                       | 50                      | 16                     | 0                              | 0.0%                    |
| M32                       | 120                     | 12                     | 3                              | 25.0%                   |
| M33                       | 2                       | 1                      | 0                              | 0.0%                    |
| <b>Total for 33 herds</b> | <b>1311</b>             | <b>243</b>             | <b>83</b>                      | <b>34.2%</b>            |



**Supplementary Table S2:** Dates of PCR positive results and cycle threshold values for calves involved in multiple outbreak peaks, n=22.

Reinfections are shown in brown cell shade

| Camel ID | 1st PCR Positive result   |                      |           |        | 2nd PCR Positive result   |                       |           |        | 3rd PCR Positive Result   |                       |           |        | 4th PCR Positive Result   |                       |           |        |
|----------|---------------------------|----------------------|-----------|--------|---------------------------|-----------------------|-----------|--------|---------------------------|-----------------------|-----------|--------|---------------------------|-----------------------|-----------|--------|
|          | Follow up No./date (2019) |                      | CT Values |        | Follow up No./date (2019) |                       | CT Values |        | Follow up No./date (2019) |                       | CT Values |        | Follow up No./date (2019) |                       | CT Values |        |
|          | FU No.                    | Date                 | NCV_E     | NCV-N2 | FU No.                    | Date                  | NCV_E     | NCV-N2 | FU No.                    | Date                  | NCV_E     | NCV-N2 | FU No.                    | Date                  | NCV_E     | NCV-N2 |
| M02C15   | 8                         | 3 <sup>rd</sup> Jun  | 20.62     | 18.68  | 12                        | 1 <sup>st</sup> Aug   | 29.96     | 27.47  | NA                        | NA                    | NA        | NA     | NA                        | NA                    | NA        | NA     |
| M03C02   | 27                        | 14 <sup>th</sup> May | 22.47     | 20.56  | 33                        | 1 <sup>st</sup> Aug   | 36.39     | 33.53  | NA                        | NA                    | NA        | NA     | NA                        | NA                    | NA        | NA     |
| M03C03   | 33                        | 1 <sup>st</sup> Aug  | 38.34     | 38.52  | 36                        | 12 <sup>th</sup> Sept | 36.1      | 32.81  | NA                        | NA                    | NA        | NA     | NA                        | NA                    | NA        | NA     |
| M03C07   | 27                        | 14 <sup>th</sup> May | 36        | 34.63  | 35                        | 29 <sup>th</sup> Aug  | 21.74     | 20.92  | NA                        | NA                    | NA        | NA     | NA                        | NA                    | NA        | NA     |
| M03C08   | 26                        | 25 <sup>th</sup> Apr | 29.9      | 22.55  | 33                        | 1 <sup>st</sup> Aug   | 36.55     | 36.27  | 36                        | 12 <sup>th</sup> Sept | 34.49     | 32.13  | NA                        | NA                    | NA        | NA     |
| M04C20   | 11                        | 16 <sup>th</sup> Jul | 18.01     | 16     | 15                        | 10 <sup>th</sup> Sept | 32.34     | 30.72  | NA                        | NA                    | NA        | NA     | NA                        | NA                    | NA        | NA     |
| M05C30   | 6                         | 13 <sup>th</sup> May | 17.07     | 16.46  | 11                        | 22 <sup>nd</sup> Jul  | 22.9      | 23.29  | NA                        | NA                    | NA        | NA     | NA                        | NA                    | NA        | NA     |
| M07C05   | 33                        | 31 <sup>st</sup> Jul | 35.86     | 32.39  | 36                        | 12 <sup>th</sup> Sept | 35.74     | 33.01  | NA                        | NA                    | NA        | NA     | NA                        | NA                    | NA        | NA     |
| M14C03   | 28                        | 17 <sup>th</sup> Jun | 32.06     | 35.15  | 33                        | 26 <sup>th</sup> Aug  | 34.29     | 34.12  | NA                        | NA                    | NA        | NA     | NA                        | NA                    | NA        | NA     |
| M14C05   | 25                        | 13 <sup>th</sup> May | 17.99     | 15.12  | 33                        | 26 <sup>th</sup> Aug  | 30.66     | 29.3   | NA                        | NA                    | NA        | NA     | NA                        | NA                    | NA        | NA     |
| M21C04   | 29                        | 30 <sup>th</sup> Jul | 21.68     | 19.54  | 32                        | 11 <sup>th</sup> Sept | 16.92     | 14.26  | NA                        | NA                    | NA        | NA     | NA                        | NA                    | NA        | NA     |
| M23C04   | 21                        | 30 <sup>th</sup> Apr | 38.25     | 36.74  | 22                        | 14 <sup>th</sup> May  | 40.1      | 36.05  | 26                        | 10 <sup>th</sup> Jul  | 27.53     | 26.18  | NA                        | NA                    | NA        | NA     |
| M23C05   | 21                        | 30 <sup>th</sup> Apr | 37.2      | 35.83  | 22                        | 14 <sup>th</sup> May  | 33.24     | 33.06  | 26                        | 10 <sup>th</sup> Jul  | 37.87     | 36.78  | NA                        | NA                    | NA        | NA     |
| M23C06   | 21                        | 30 <sup>th</sup> Apr | 21.87     | 20.22  | 22                        | 14 <sup>th</sup> May  | 38.6      | 38.7   | 26                        | 10 <sup>th</sup> Jul  | 20.27     | 17.53  | NA                        | NA                    | NA        | NA     |
| M23C07   | 21                        | 30 <sup>th</sup> Apr | 15.08     | 14.5   | 23                        | 28 <sup>th</sup> May  | 36.62     | 37.95  | 26                        | 10 <sup>th</sup> Jul  | 34.9      | 33.07  | NA                        | NA                    | NA        | NA     |
| M23C08   | 21                        | 30 <sup>th</sup> Apr | 35.94     | 34.24  | 27                        | 23 <sup>rd</sup> Jul  | 37.85     | 32.24  | NA                        | NA                    | NA        | NA     | NA                        | NA                    | NA        | NA     |
| M23C14   | 5                         | 30 <sup>th</sup> Apr | 19.18     | 16.94  | 7                         | 28 <sup>th</sup> May  | 35.05     | 35.05  | 11                        | 23 <sup>rd</sup> Jul  | 25.52     | 25.49  | NA                        | NA                    | NA        | NA     |
| M23C15   | 5                         | 30 <sup>th</sup> Apr | 18.83     | 20.54  | 11                        | 23 <sup>rd</sup> Jul  | 28.1      | 20.86  | NA                        | NA                    | NA        | NA     | NA                        | NA                    | NA        | NA     |
| M25C05   | 21                        | 14 <sup>th</sup> May | 22.78     | 18.67  | 27                        | 31 <sup>st</sup> Jul  | 33.94     | 31.19  | NA                        | NA                    | NA        | NA     | NA                        | NA                    | NA        | NA     |
| M25C08   | 21                        | 14 <sup>th</sup> May | 16.41     | 15.41  | 27                        | 30 <sup>th</sup> Jul  | 19.62     | 15.72  | NA                        | NA                    | NA        | NA     | NA                        | NA                    | NA        | NA     |
| M28C01   | 16                        | 4 <sup>th</sup> Jul  | 36.09     | 32.55  | 17                        | 17 <sup>th</sup> Jul  | 37.83     | 35.85  | 18                        | 31 <sup>st</sup> Jul  | 33.74     | 29.21  | 21                        | 11 <sup>th</sup> Sept | 30.55     | 28.64  |
| M28C02   | 15                        | 20 <sup>th</sup> Jun | 19.82     | 17.58  | 16                        | 4 <sup>th</sup> Jul   | 38.87     | 39     | 21                        | 11 <sup>th</sup> Sept | 30.84     | 30.94  | NA                        | NA                    | NA        | NA     |



**Supplementary Table S3:** Demographic characteristics, clinical and contact history of the 3 human MERS-CoV cases detected in Northern, Kenya. (Updated table adopted from Munyua et al, 2021)<sup>15</sup>

| <b>Variable</b>                                                                  | <b>Case 1</b>                              | <b>Case 2</b>                                       | <b>Case 3</b>                                       |
|----------------------------------------------------------------------------------|--------------------------------------------|-----------------------------------------------------|-----------------------------------------------------|
| <i>Age (yrs.)</i>                                                                | 20                                         | 50                                                  | 24                                                  |
| <i>Sex</i>                                                                       | Female                                     | Male                                                | Male                                                |
| <i>Herd Name</i>                                                                 | Kamboe (M33)                               | Quachacha (M21)                                     | Kubi Onre(M07)                                      |
| <i>Occupation</i>                                                                | Spouse to a camel herder                   | Camel herder                                        | Camel herder                                        |
| <i>Enrolled on (Date)</i>                                                        | 6/23/2019                                  | 5/21/2019                                           | 5/2/2018                                            |
| <i>PCR Positive on (Date)</i>                                                    | 7/31/2019                                  | 8/13/2019                                           | 9/12/2019                                           |
| <i>Number of follow ups</i>                                                      | 3                                          | 3                                                   | 16                                                  |
| <i>Clinical signs on day of sampling</i>                                         | None                                       | None                                                | None                                                |
| <i>Underlying illness (e.g., HIV, TB, Cancer),<br/>Smoking or Travel history</i> | None                                       | None                                                | None                                                |
| <i>Number of household occupants</i>                                             | 12                                         | 10                                                  | 9                                                   |
| <i>Any ill HH member?</i>                                                        | No                                         | No                                                  | No                                                  |
| <i>Type of camel contact</i>                                                     | Infrequent camel contact                   | Herding, Milking, Feeding, Grooming, Cleaning barns | Herding, Milking, Feeding, Grooming, Cleaning barns |
| <i>Contact with PCR Positive camels in herd/village</i>                          | 1 PCR positive camel in a herd <2.5Km away | 1 PCR positive camel in the herd 2 weeks prior      | 3 PCR positive camels in the herd on same day       |



**Supplementary Table S4:** Comparison of MERS-CoV genetic sequences from nasal swabs and culture isolates of camel samples from Marsabit, Kenya

| Camel ID | Date of camel sampling | Sample type | Sequence       | Sequence comparison for full genome and S gene       |
|----------|------------------------|-------------|----------------|------------------------------------------------------|
| M23C06   | 4/30/2019              | Nasal Swab  | full genome    | identical except mixed bases (2481Y)                 |
| M23C06   | 4/30/2019              | isolate     | full genome    | identical except mixed bases (2481T)                 |
| M23C06   | 5/14/2019              | Nasal Swab  | not available  |                                                      |
| M23C04   | 4/30/2019              | Nasal Swab  | partial S gene | identical                                            |
| M23C04   | 5/14/2019              | Nasal Swab  | partial S gene |                                                      |
| M23C05   | 5/14/2019              | Nasal Swab  | partial S gene | 1018/22473R <sup>1</sup>                             |
| M23C05   | 4/30/2019              | Nasal Swab  | partial S gene | 1018/22473G <sup>1</sup>                             |
| M23C07   | 4/30/2019              | Nasal Swab  | full genome    | identical except mixed bases (2481T, 11786C)         |
| M23C07   | 4/30/2019              | isolate     | full genome    | identical except mixed bases (2481Y, 11786Y)         |
| M23C07   | 5/28/2019              | Nasal Swab  | partial S gene | identical based on available sequences               |
| M23C09   | 4/30/2019              | Nasal Swab  | partial S gene | 2212/23667C <sup>1</sup>                             |
| M23C09   | 5/14/2019              | Nasal Swab  | partial S gene | 2212/23667Y <sup>1</sup>                             |
| M23C15   | 4/30/2019              | Nasal Swab  | full genome    | identical except mixed bases (2481Y)                 |
| M23C15   | 4/30/2019              | isolate     | full genome    | identical except mixed bases (2481T)                 |
| M23C14   | 4/30/2019              | Nasal Swab  | full genome    | identical except mixed bases (2481T, 26219C, 26294R) |
| M23C14   | 4/30/2019              | isolate     | full genome    | identical except mixed bases (2481Y, 26219Y, 26294A) |
| M23C14   | 5/28/2019              | Nasal Swab  | partial S gene | identical based on available sequences               |
| M23C01   | 4/30/2019              | Nasal Swab  | partial S gene | identical based on available sequences               |
| M23C02   | 4/30/2019              | Nasal Swab  | full genome    | identical based on available sequences               |
| M23C08   | 4/30/2019              | Nasal Swab  | partial S gene | identical based on available sequences               |

<sup>1</sup>position of S/genome
